# Supplementary material for: Regulation of Cholesterol Homeostasis by Hedgehog Signaling in Osteoarthritic Cartilage
Source: PubMed Central journal article supplement — Arthritis Rheumatol. 2015 Dec 23;68(1):127–37. doi: 10.1002/art.39337 (PMC4690757; doi:10.1002/art.39337), 2015-12-23
Supplement: NIHMS717370-supplement-Supp_TableS1___FigureS1-S8.pdf [file NIHMS717370-supplement-Supp_TableS1___FigureS1-S8.pdf]

**A**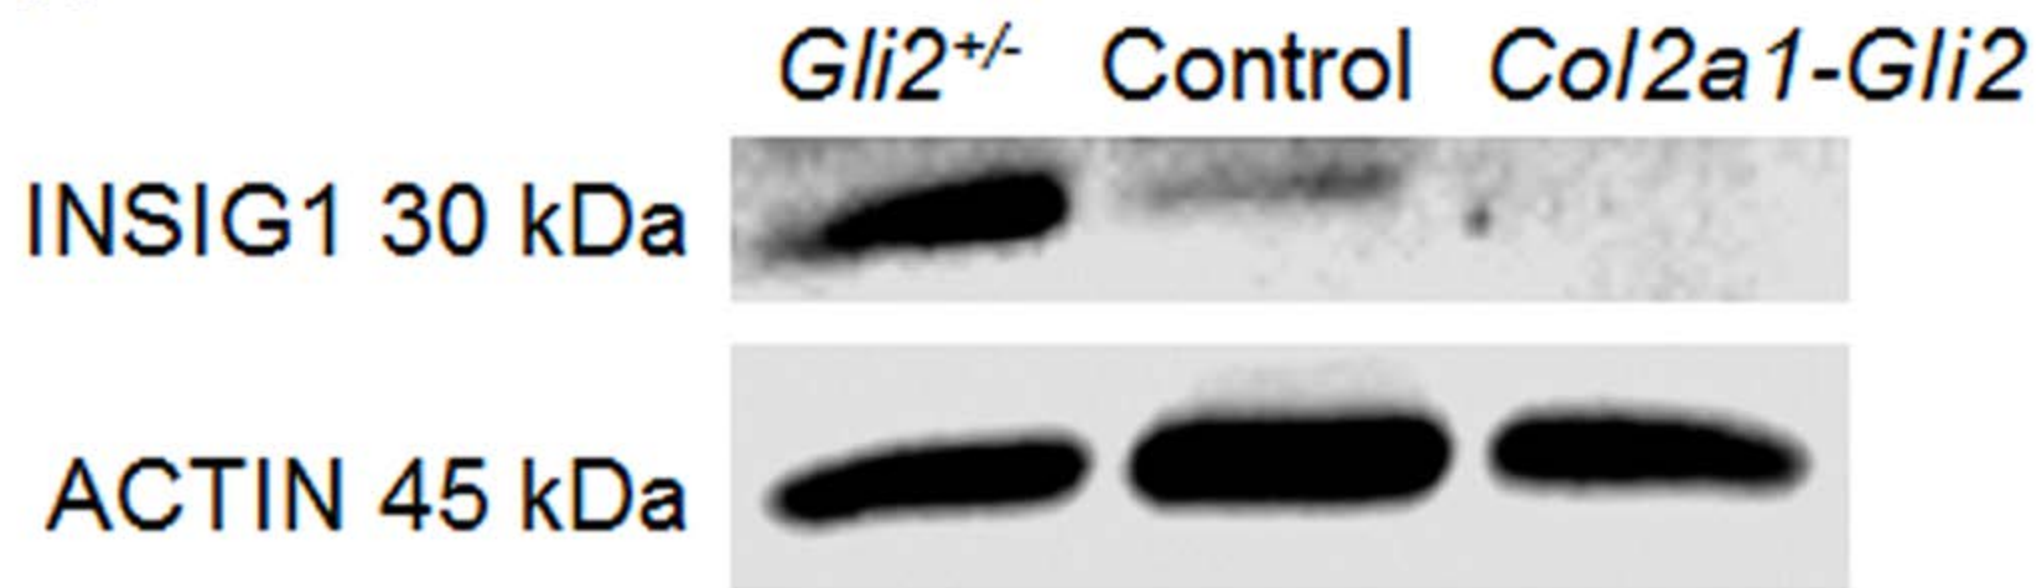**B**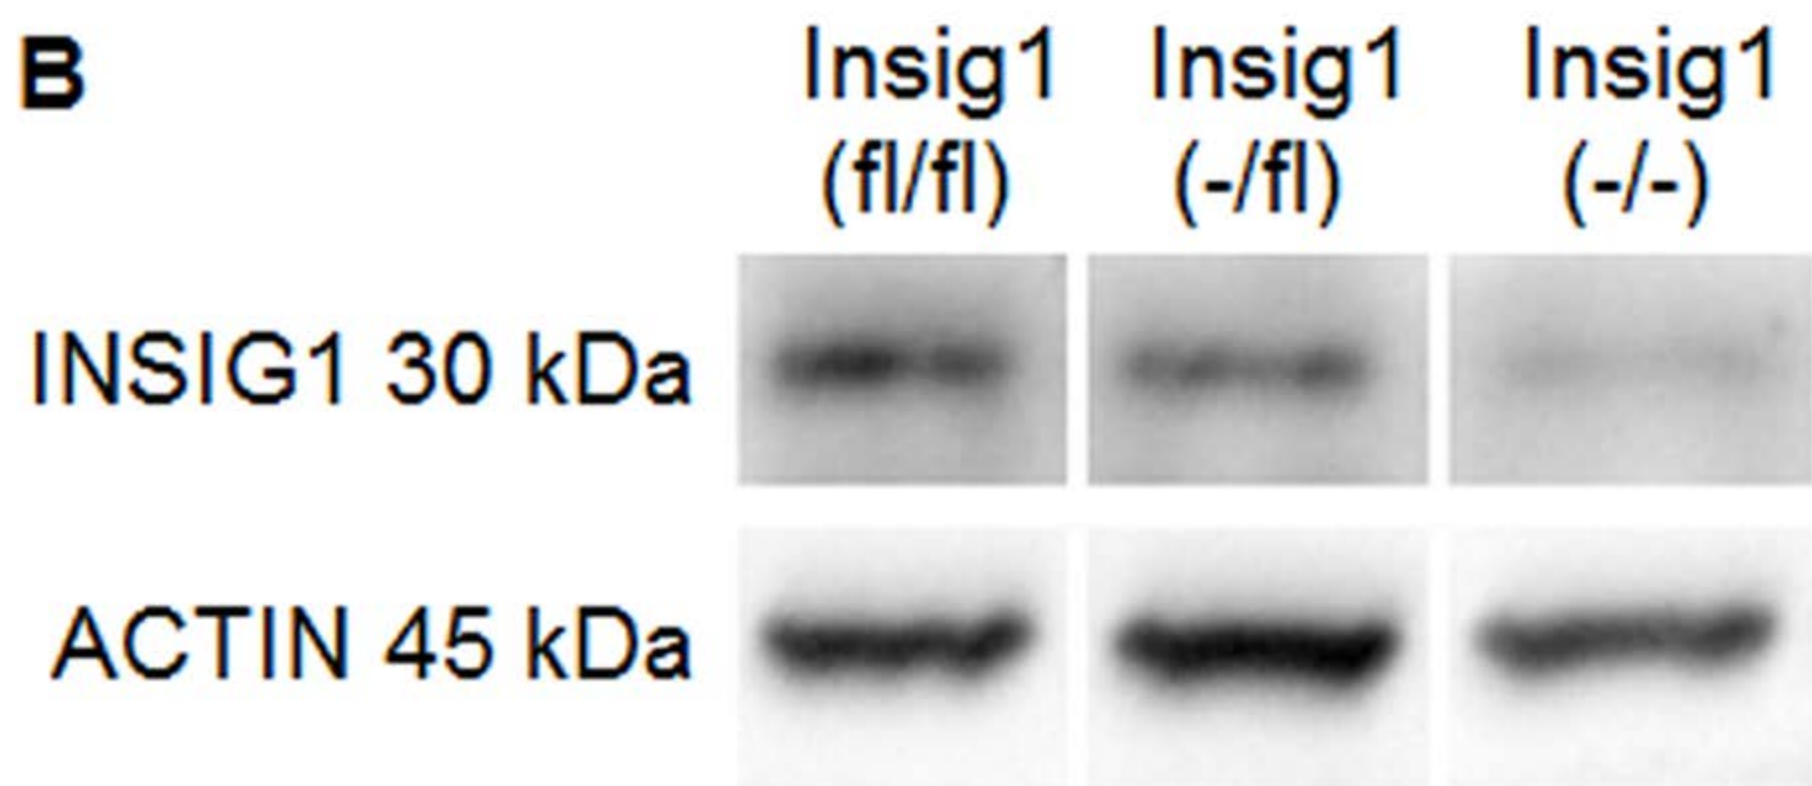

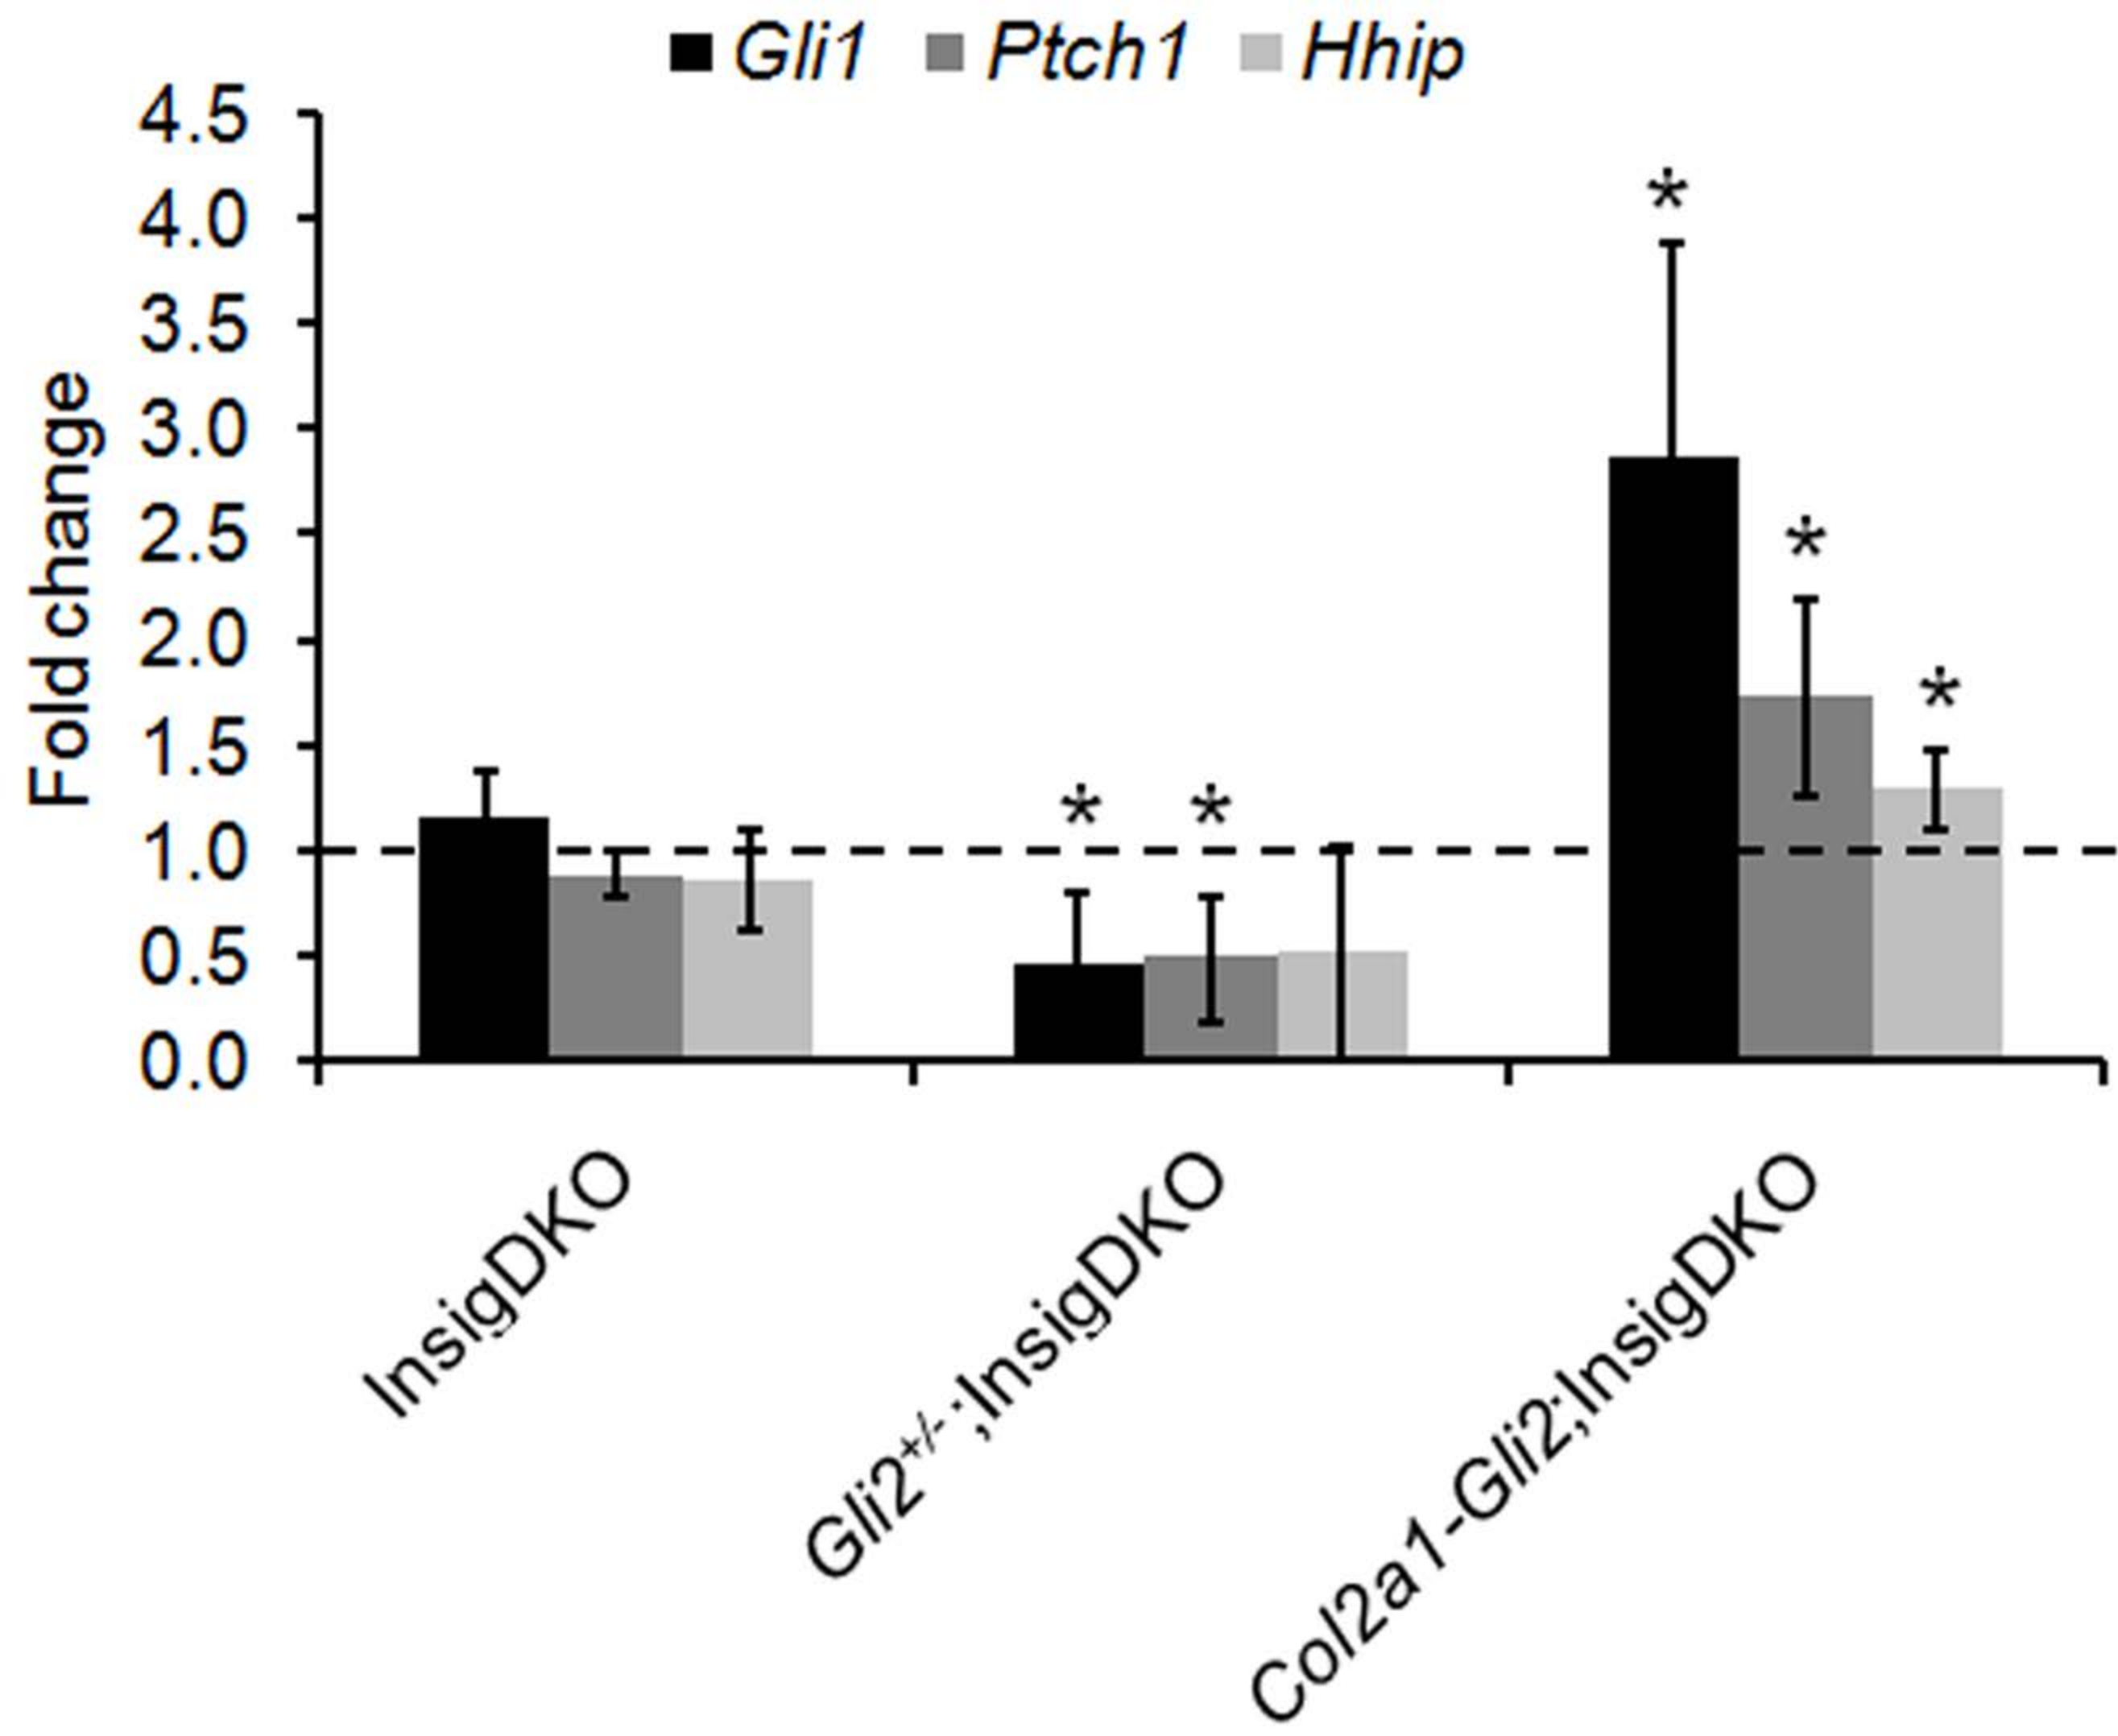

BV/TV

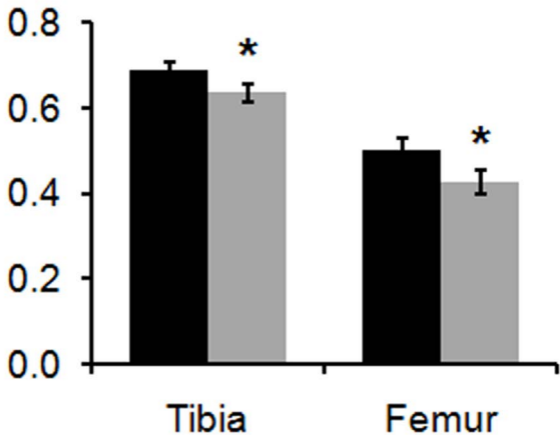

Control

InsigDKO

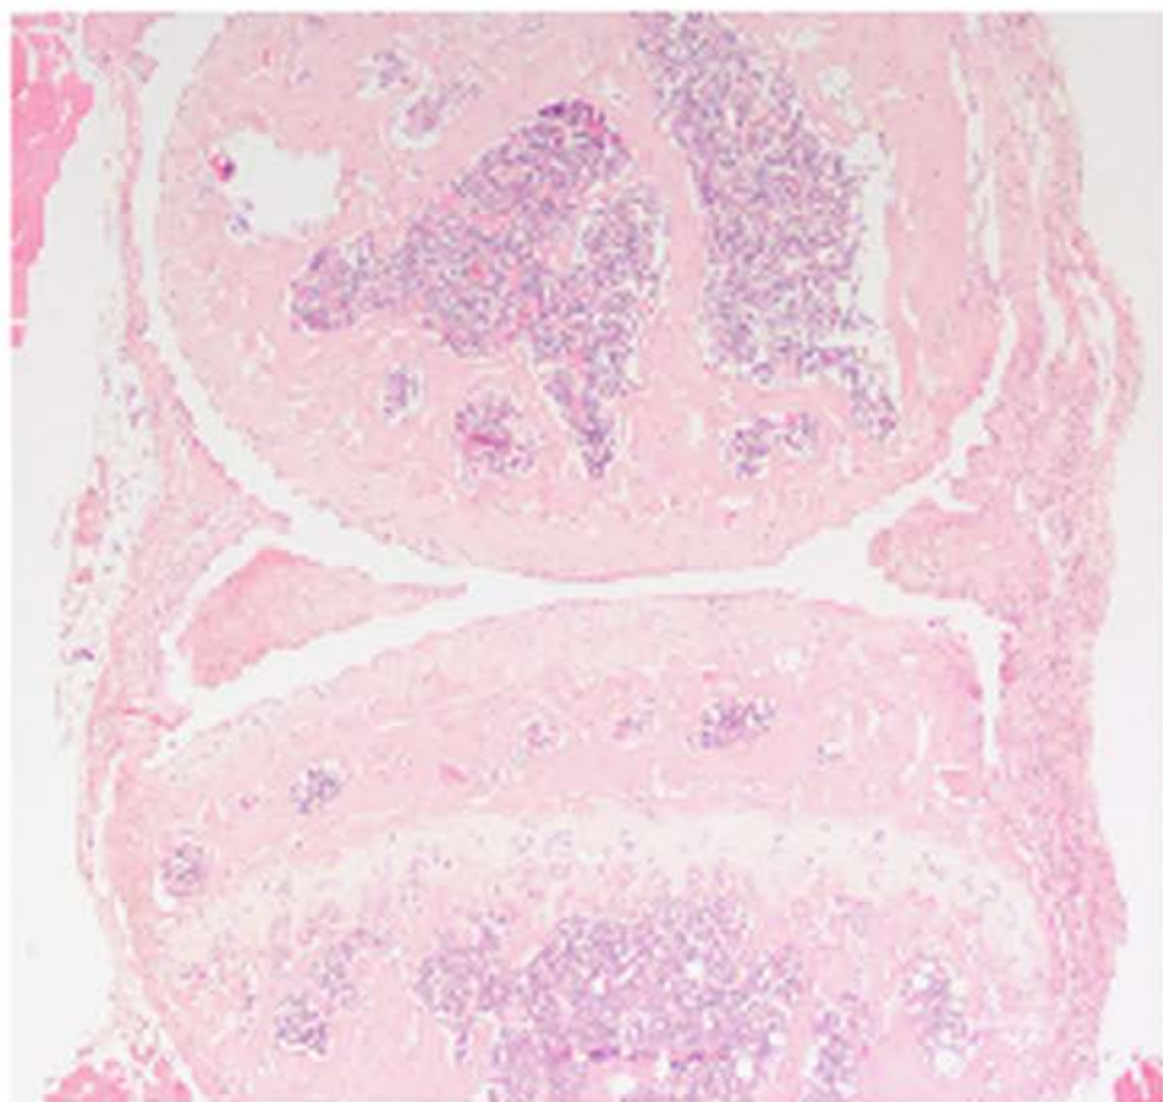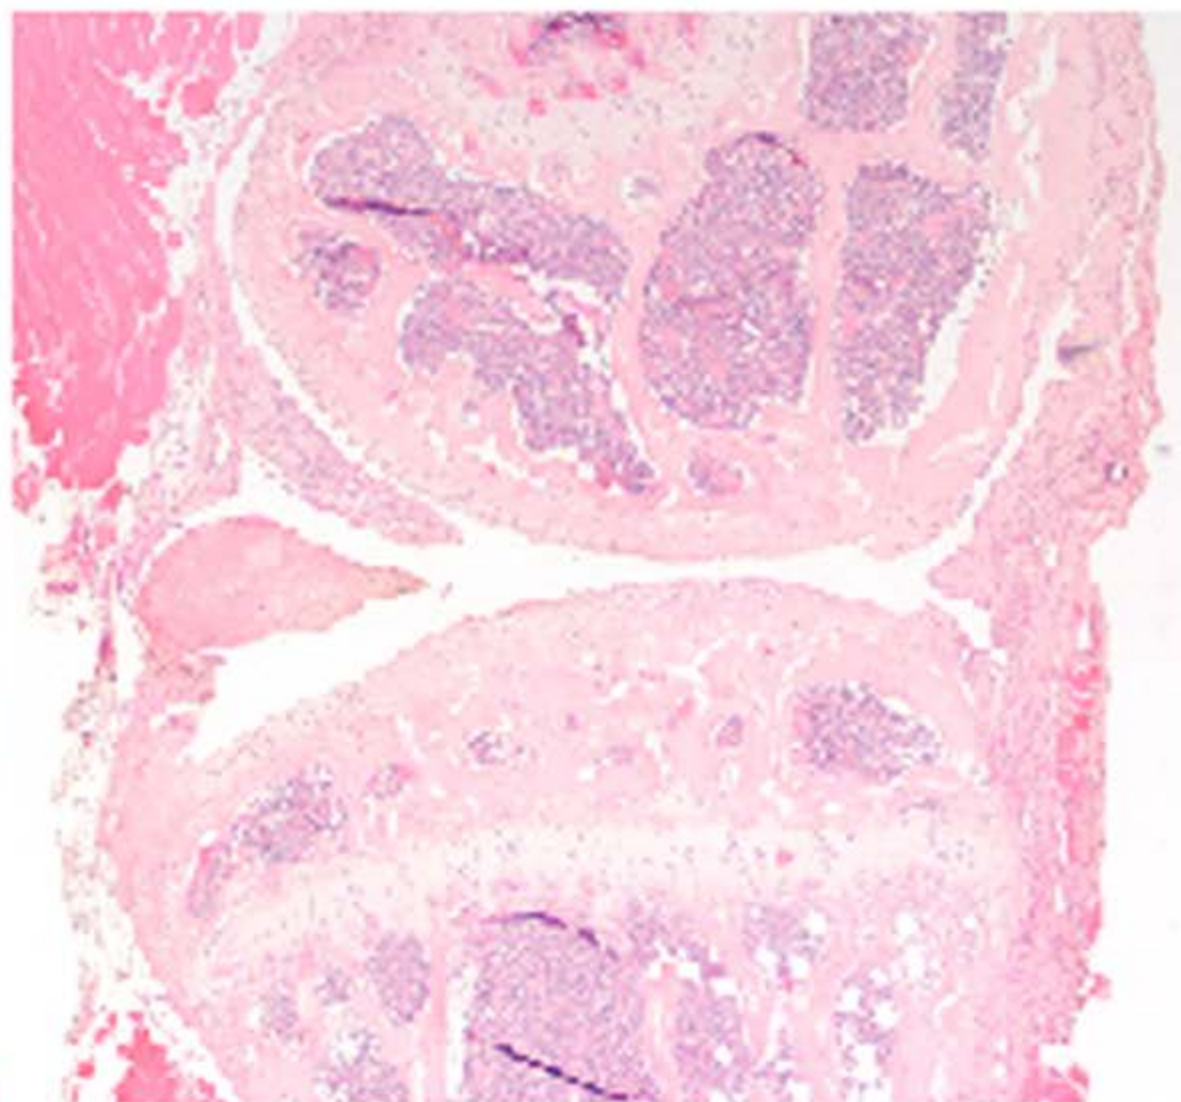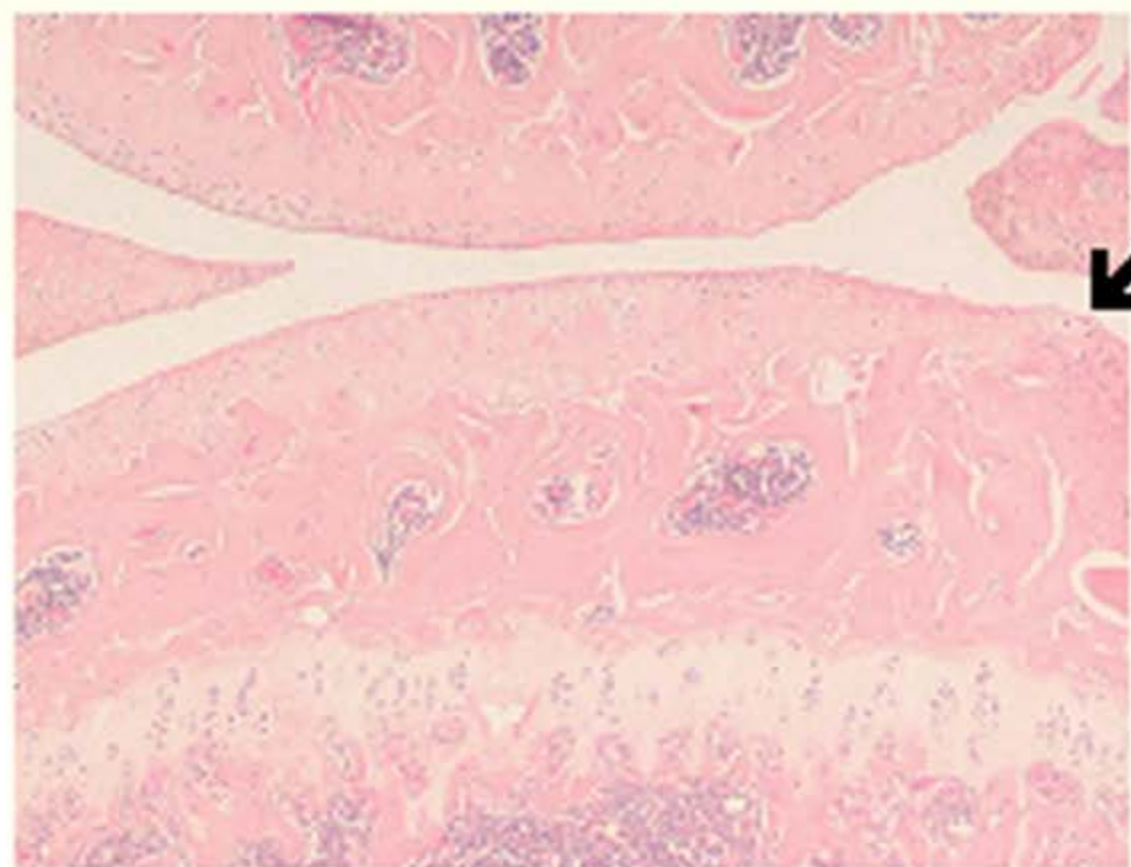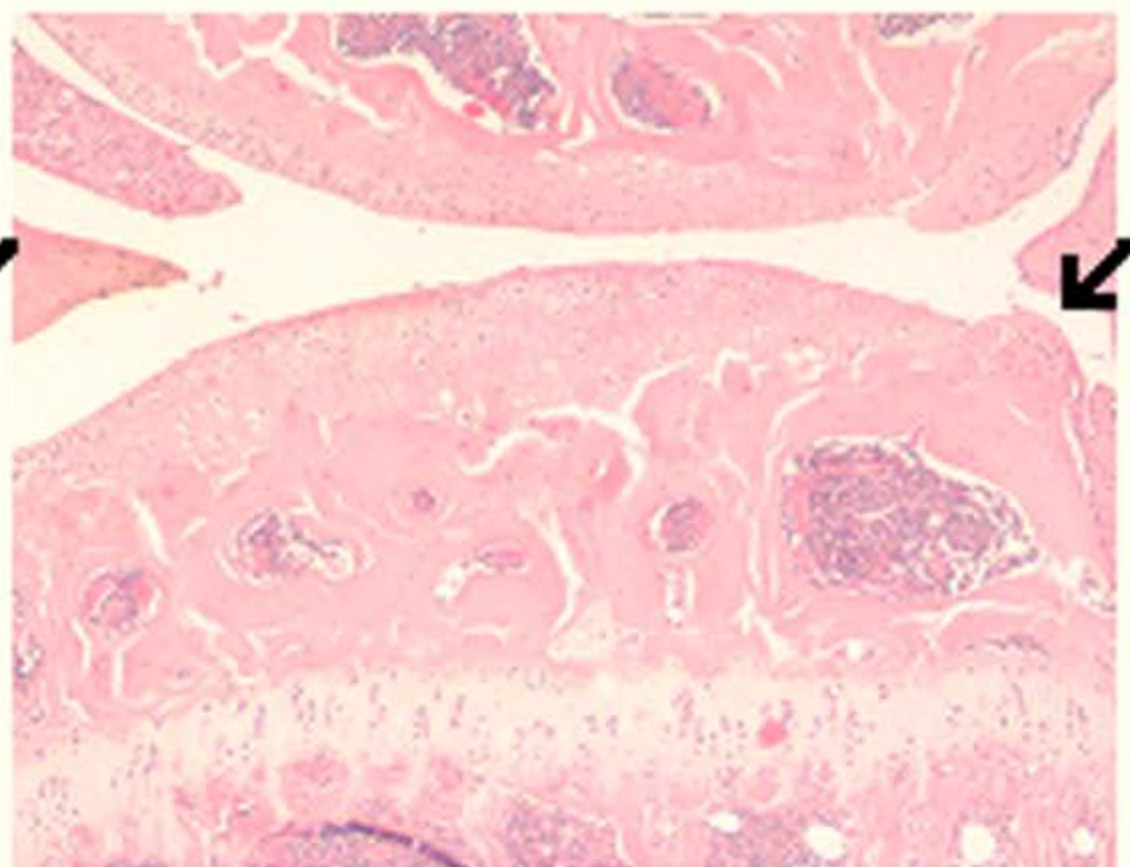

Placebo

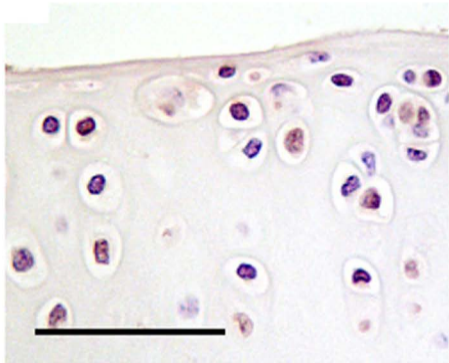

Statin

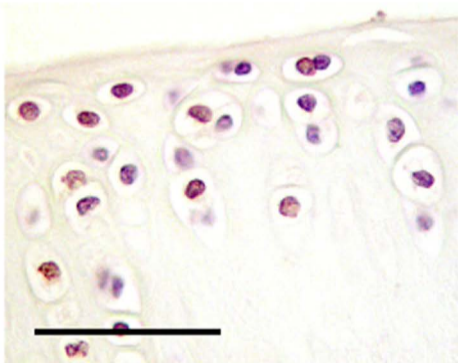

*Col2a1-Gli2*

InsigDKO

*Col2a1-Gli2*;  
InsigDKO

Placebo

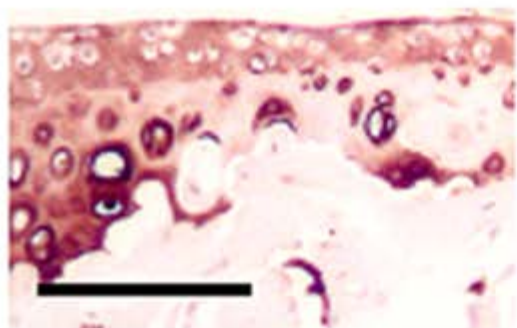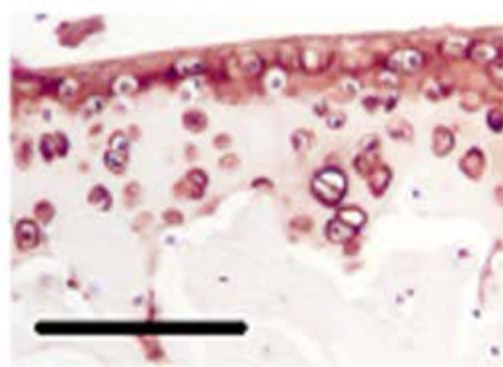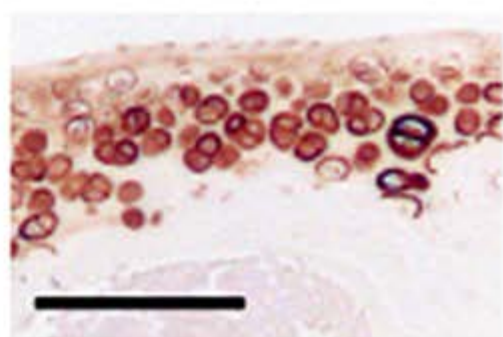

Statin

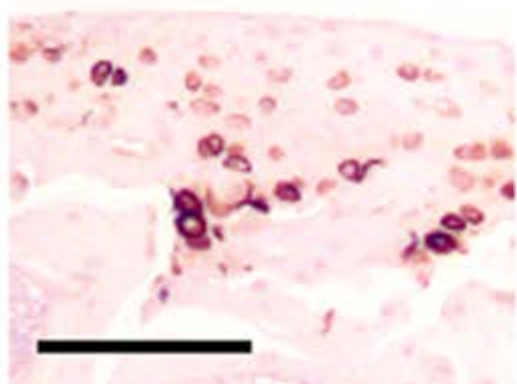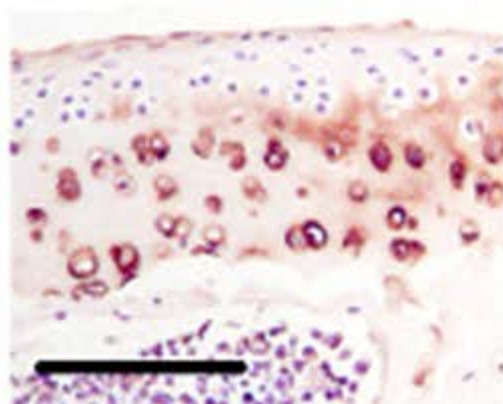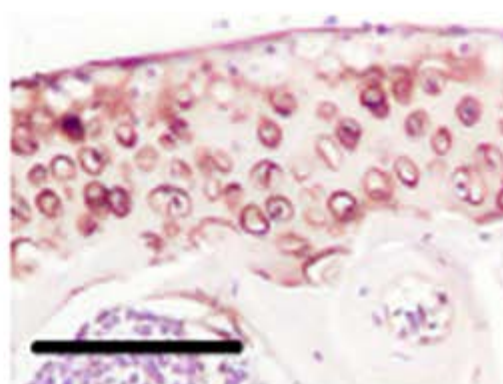

Surgery

Control

InsigDKO

Placebo

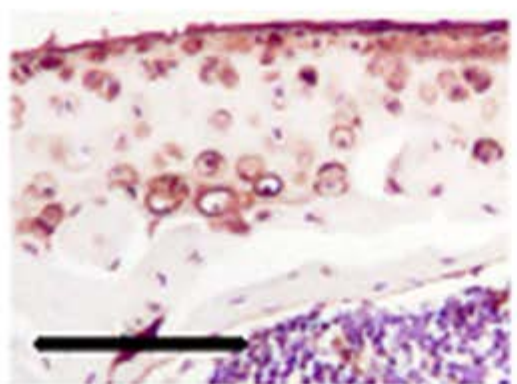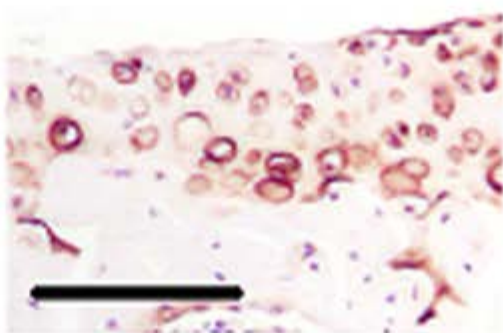

Statin

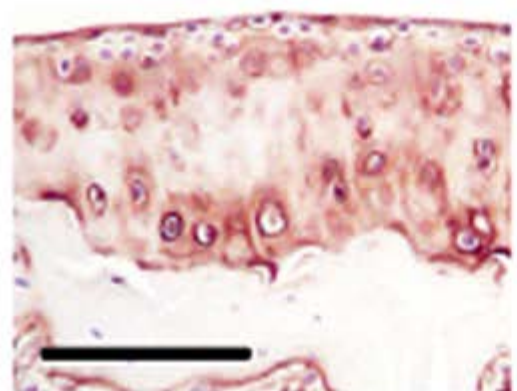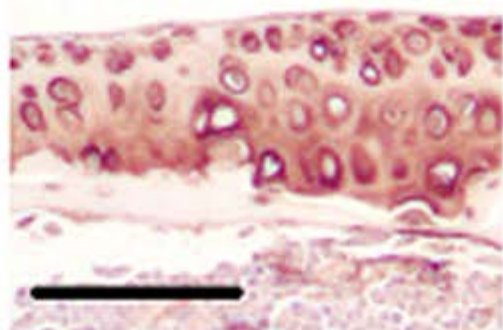

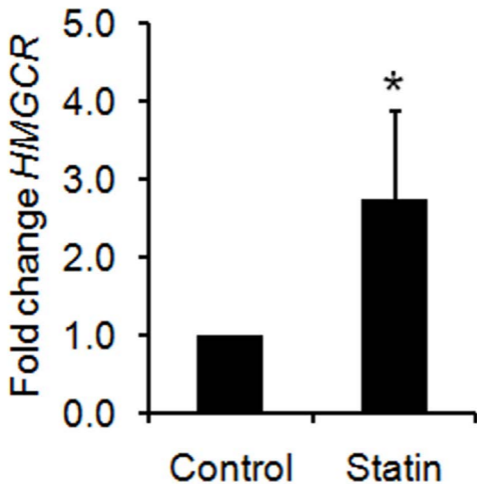

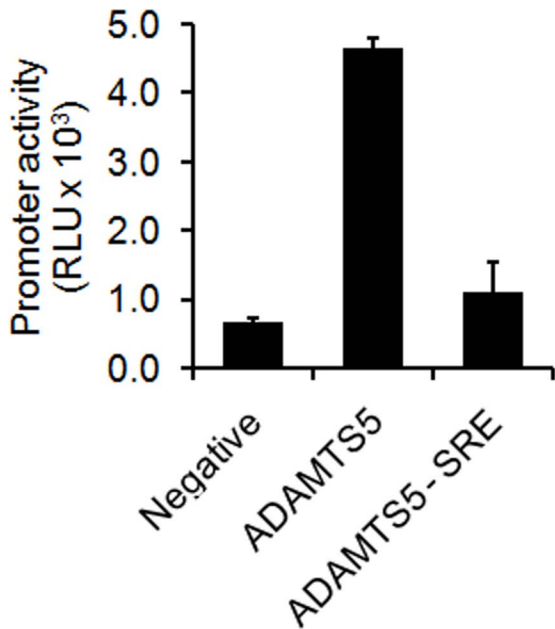



|                                             |                          |                     |
|---------------------------------------------|--------------------------|---------------------|
| <b>Top Biological Functions</b>             |                          | <b>p-value</b>      |
| Diseases and Disorders                      | Inflammatory Response    | 1.03E-04 - 2.31E-02 |
| Molecular and Cellular Functions            | Lipid Metabolism         | 2.27E-11 - 2.53E-02 |
| Physiological System Development & Function | Reproductive System      | 4.80E-05 - 1.65E-02 |
| <b>Top Canonical Pathways</b>               | Biosynthesis of Steroids | 1.30E-09            |
| <b>Top Toxicity Lists</b>                   | Cholesterol Biosynthesis | 3.91E-13            |
| <b>Top Toxicity Functions</b>               |                          |                     |
| Cardiotoxicity                              | Cardiac Hemorrhaging     | 5.06E-02 - 5.03E-01 |
| Hepatotoxicity                              | Liver Hepatomegaly       | 1.37E-02 - 1.56E-01 |
| Nephrotoxicity                              | Renal Nephritis          | 3.10E-02 - 1.44E-01 |

**Table S1**

**A**

| ICRS Cartilage Scoring Scale | Control   | InsigDKO  |
|------------------------------|-----------|-----------|
| 1) Surface                   | 3.0 ± 0.0 | 2.3 ± 0.9 |
| 2) Matrix                    | 3.0 ± 0.0 | 2.5 ± 1.0 |
| 3) Cell Distribution         | 2.5 ± 0.6 | 2.0 ± 0.8 |
| 4) Cell Population Viability | 3.0 ± 0.0 | 2.8 ± 0.5 |
| 5) Subchondral Bone          | 2.8 ± 0.5 | 0.5 ± 0.6 |
| 6) Cartilage Mineralization  | 3.0 ± 0.0 | 1.3 ± 0.5 |
| ICRS Summary Score           | 17.3      | 11.3      |
| P-value (U-test)             |           | P=0.020   |

**B**

| ICRS Cartilage Scoring Scale | <i>Col2a1-Gli2</i> |           | InsigDKO  |           | <i>Col2a1-Gli2</i> ; InsigDKO |           |
|------------------------------|--------------------|-----------|-----------|-----------|-------------------------------|-----------|
|                              | Placebo            | Statin    | Placebo   | Statin    | Placebo                       | Statin    |
| 1) Surface                   | 2.7 ± 0.7          | 3.0 ± 0.0 | 2.8 ± 0.5 | 3.0 ± 0.0 | 2.3 ± 0.7                     | 3.0 ± 0.0 |
| 2) Matrix                    | 2.7 ± 0.7          | 2.7 ± 0.7 | 2.8 ± 0.5 | 3.0 ± 0.0 | 2.0 ± 0.0                     | 3.0 ± 0.0 |
| 3) Cell Distribution         | 2.0 ± 0.0          | 2.7 ± 0.7 | 2.3 ± 0.9 | 2.7 ± 0.7 | 2.0 ± 0.0                     | 2.7 ± 0.7 |
| 4) Cell Population Viability | 2.7 ± 0.7          | 3.0 ± 0.0 | 2.8 ± 0.5 | 3.0 ± 0.0 | 2.7 ± 0.7                     | 3.0 ± 0.0 |
| 5) Subchondral Bone          | 2.7 ± 0.7          | 3.0 ± 0.0 | 1.5 ± 0.6 | 3.0 ± 0.0 | 2.0 ± 0.0                     | 2.7 ± 0.7 |
| 6) Cartilage Mineralization  | 2.0 ± 1.1          | 3.0 ± 0.0 | 1.8 ± 0.5 | 3.0 ± 0.0 | 2.7 ± 0.7                     | 3.0 ± 0.0 |
| ICRS Summary Score           | 14.7               | 17.3      | 13.8      | 17.7      | 13.7                          | 17.3      |
| P-value (U-test)             | P=0.043            |           | P=0.026   |           | P=0.046                       |           |

**C**

| ICRS Cartilage Scoring Scale | Surgery   |           |           |           |
|------------------------------|-----------|-----------|-----------|-----------|
|                              | Control   |           | InsigDKO  |           |
|                              | Placebo   | Statin    | Placebo   | Statin    |
| 1) Surface                   | 2.0 ± 0.0 | 2.7 ± 0.7 | 1.3 ± 0.7 | 2.7 ± 0.7 |
| 2) Matrix                    | 2.7 ± 0.7 | 3.0 ± 0.0 | 2.0 ± 1.1 | 3.0 ± 0.0 |
| 3) Cell Distribution         | 1.7 ± 0.7 | 2.7 ± 0.7 | 1.3 ± 0.7 | 2.3 ± 0.7 |
| 4) Cell Population Viability | 2.0 ± 0.0 | 2.7 ± 0.7 | 2.3 ± 0.7 | 2.7 ± 0.7 |
| 5) Subchondral Bone          | 1.7 ± 0.7 | 2.3 ± 0.7 | 1.7 ± 0.7 | 3.0 ± 0.0 |
| 6) Cartilage Mineralization  | 2.7 ± 0.7 | 3.0 ± 0.0 | 2.7 ± 0.7 | 3.0 ± 0.0 |
| ICRS Summary Score           | 12.7      | 16.3      | 11.3      | 16.7      |
| P-value (U-test)             | P=0.046   |           | P=0.046   |           |

**Table S2**
